# Supplementary material for: Synthesis of 2D cobalt oxide nanosheets using a room temperature liquid metal
Source: Royal Society of Chemistry journal article supplement (doi:10.1039/d0ra06010k), 2020-01-01
Supplement: d0ra06010k1.pdf [file d0ra06010k1.pdf]

## Supplementary information

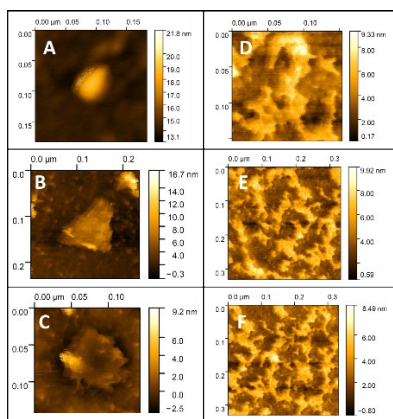

**Figure S1.** AFM images of 0.5 wt % Co-GaInSn produced in 10 mM HCl which is fresh (A, B and C) and after 1 week (D, E and F).

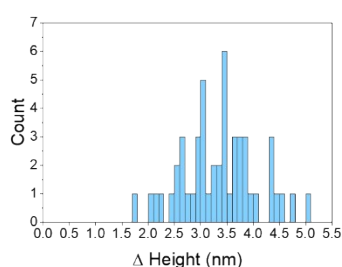

**Figure S2.** Histogram of 50 measurements of CoO<sub>x</sub> sheets from 0.5 wt % Co-GaInSn produced in 10 mM HCl that was allowed to age for 1 week.

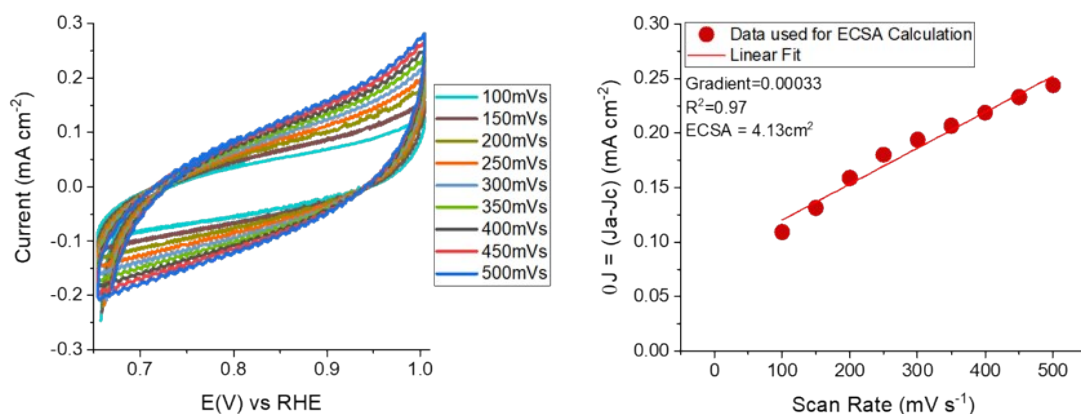

**Figure S3.** Cyclic voltammograms recorded for 2D CoO<sub>x</sub> in 0.1 M NaOH at various scan rates in the double layer charging region. Plot of capacitive current obtained at 0.85 V vs RHE versus sweep rate.

The Electrochemically active surface area was calculated using the gradient of the plot, assuming that a flat surface has a specific capacitance of  $40 \mu\text{F cm}^{-2}$ , method adopted by *Deng et al.*

1. Deng, H., et al., Laser induced  $\text{MoS}_2$ /carbon hybrids for hydrogen evolution reaction catalysts. *Journal of Materials Chemistry A*, 2016, **4**, 6824-6830.

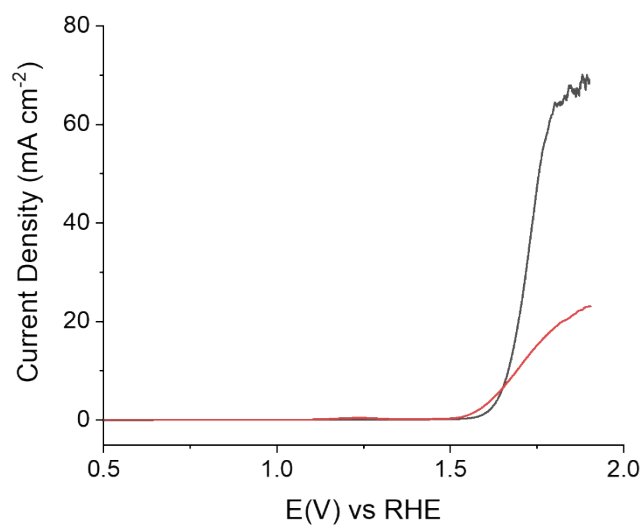

**Figure S4.** Cyclic voltammogram of a fresh (black) and 1 week old (red)  $\text{CoO}_x$  nanosheets from 0.5 wt % Co-GaInSn in 10 mM HCl sample.
